# Supplementary material for: Durable Survival Outcomes After Liver Transplantation for Colorectal Liver Metastases: A Systematic Review and Single-Arm Meta-analysis
Source: Research Square preprint supplement (doi:10.21203/rs.3.rs-8843372/v1), 2026-02-24
Supplement: Supplementary file 1 [file 2f29af9f0c41234c3d839469.docx]

**
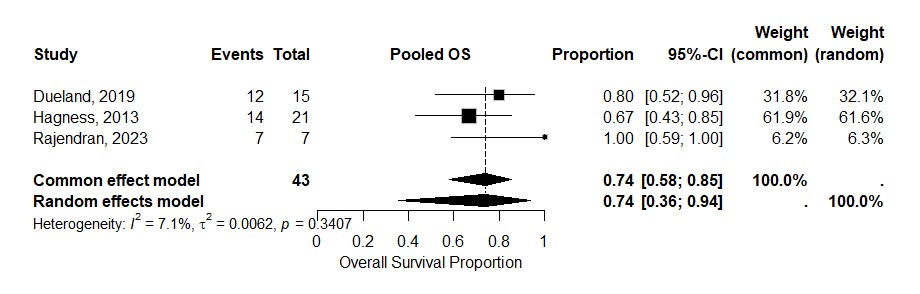
**

**Supplementary Figure S1: Leave-one-out Sensitivity Analysis Forest Plot for 3-Year Overall Survival**

**
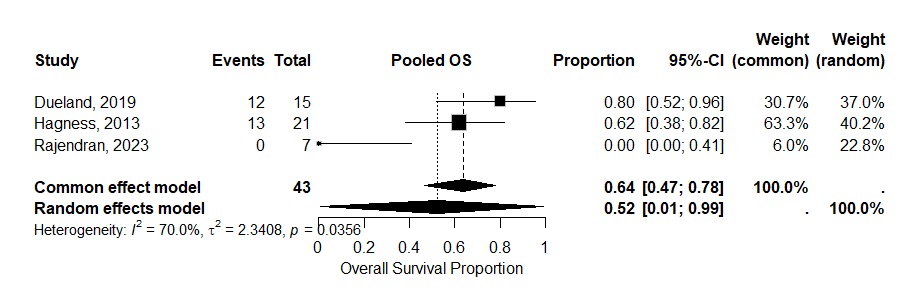
**

**Supplementary Figure S2: Leave-one-out Sensitivity Analysis Forest Plot for 5-Year Overall Survival**

**
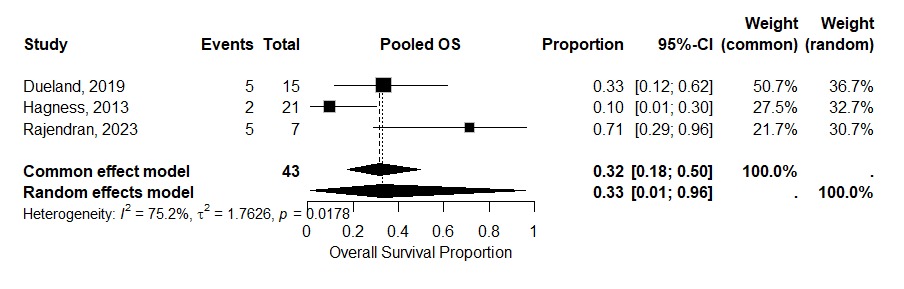
**

**Supplementary Figure S3: Leave-one-out Sensitivity Analysis Forest Plot for 3-Year Progression-Free Survival**

**
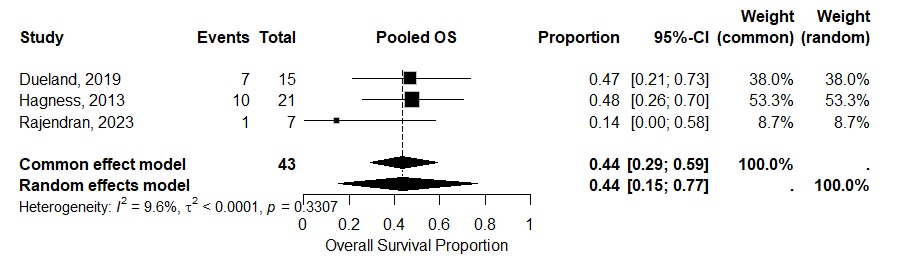
**

**Supplementary Figure S4: Leave-one-out Sensitivity Analysis Forest Plot for Adverse Event**
